# Supplementary figures and images for: Genome-Wide Characterization and Analysis of Metallothionein Family Genes That Function in Metal Stress Tolerance in Brassica napus L
Source: MDPI journal article supplement (doi:10.3390/ijms19082181), 2018-07-26

B33-CK

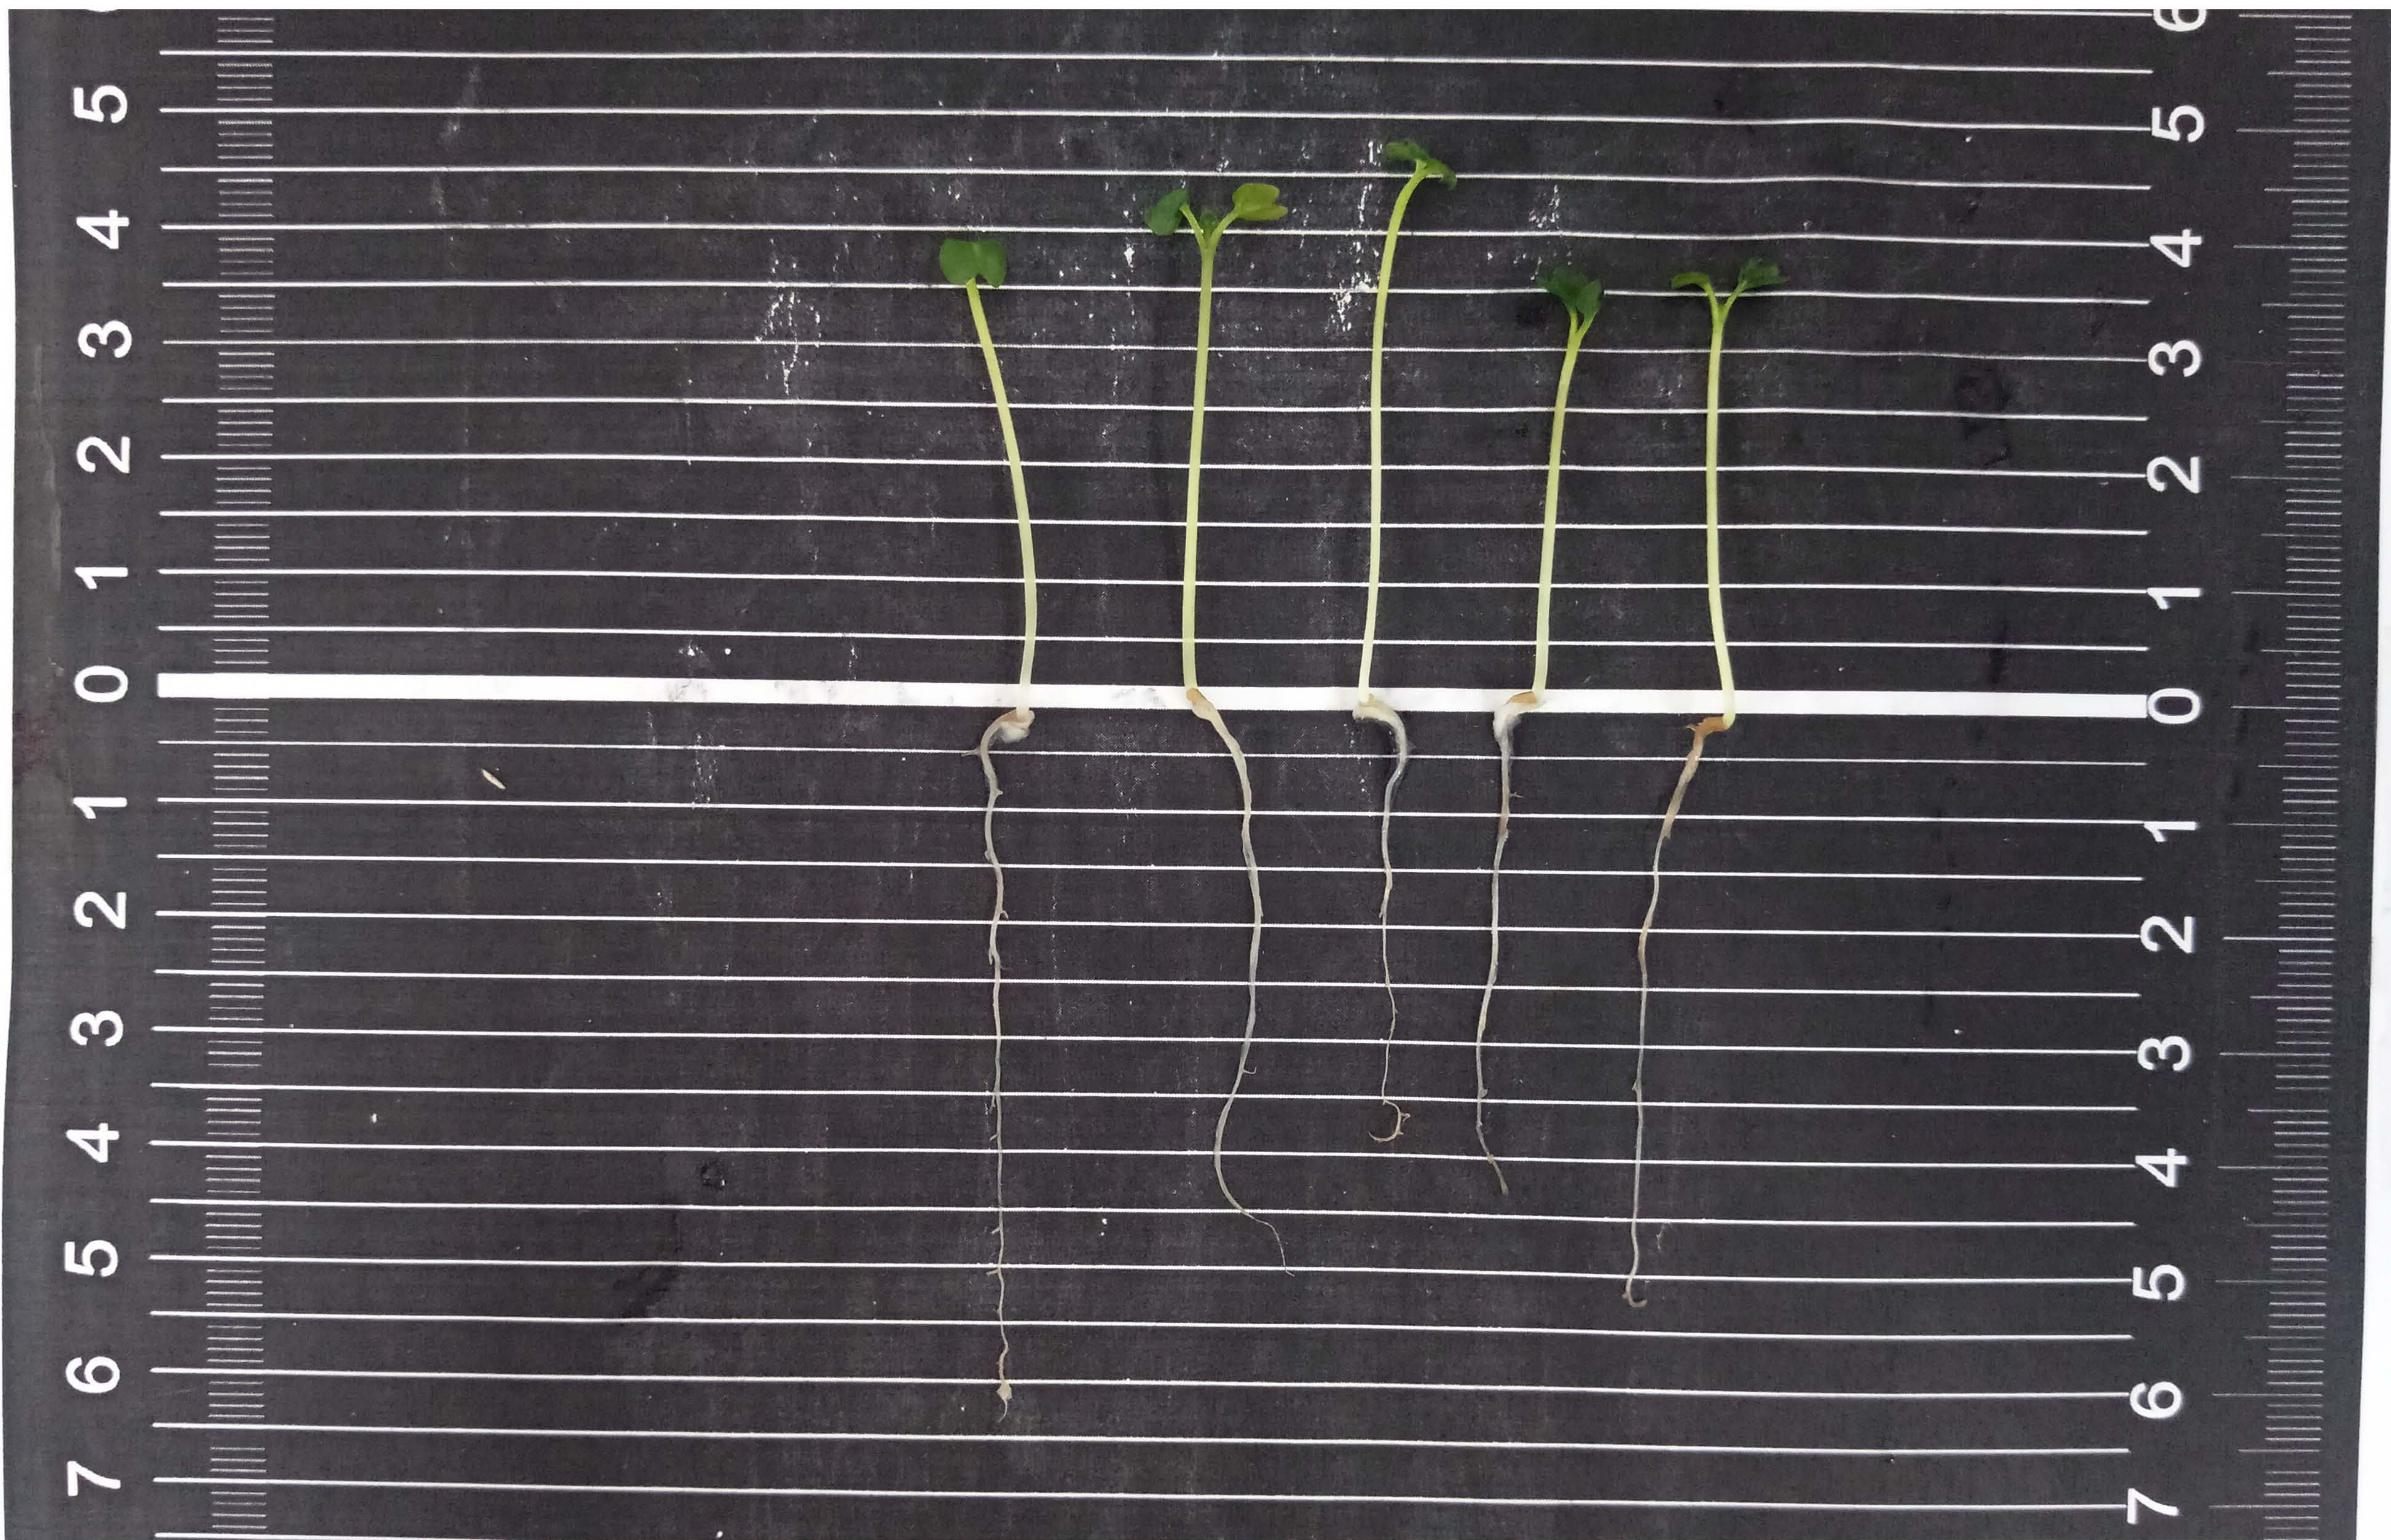

B33-As<sup>3+</sup>

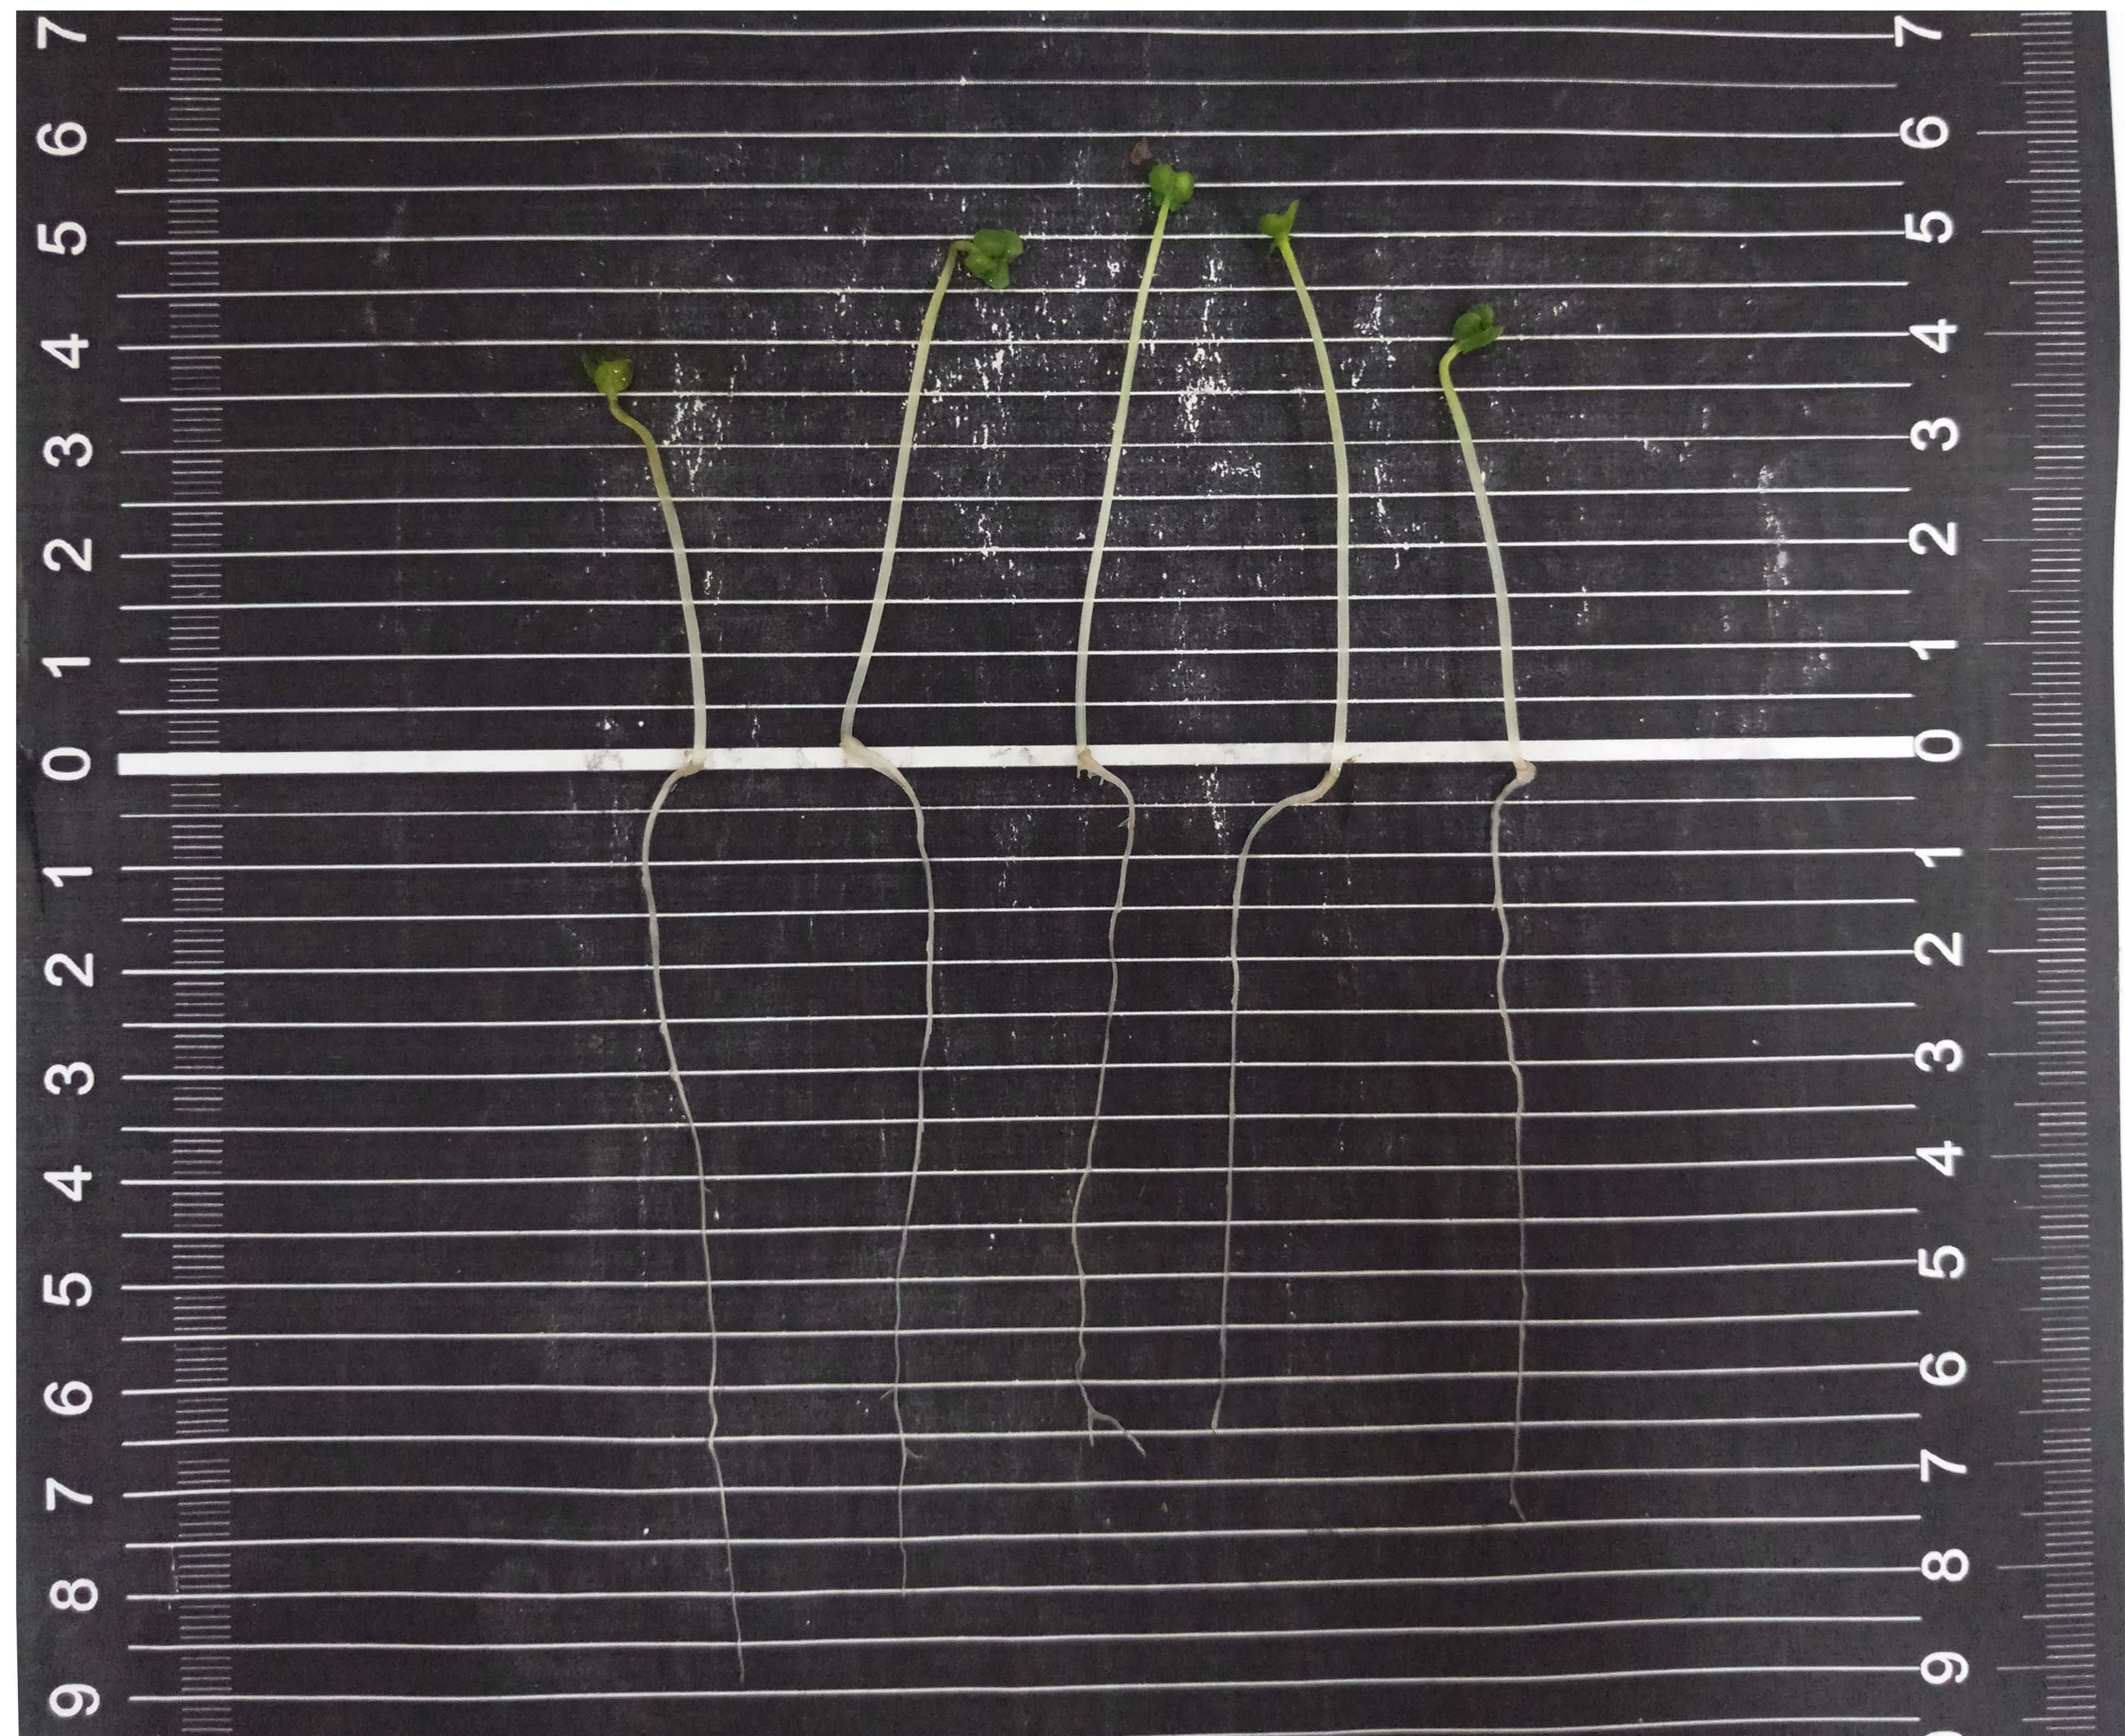

B34-CK

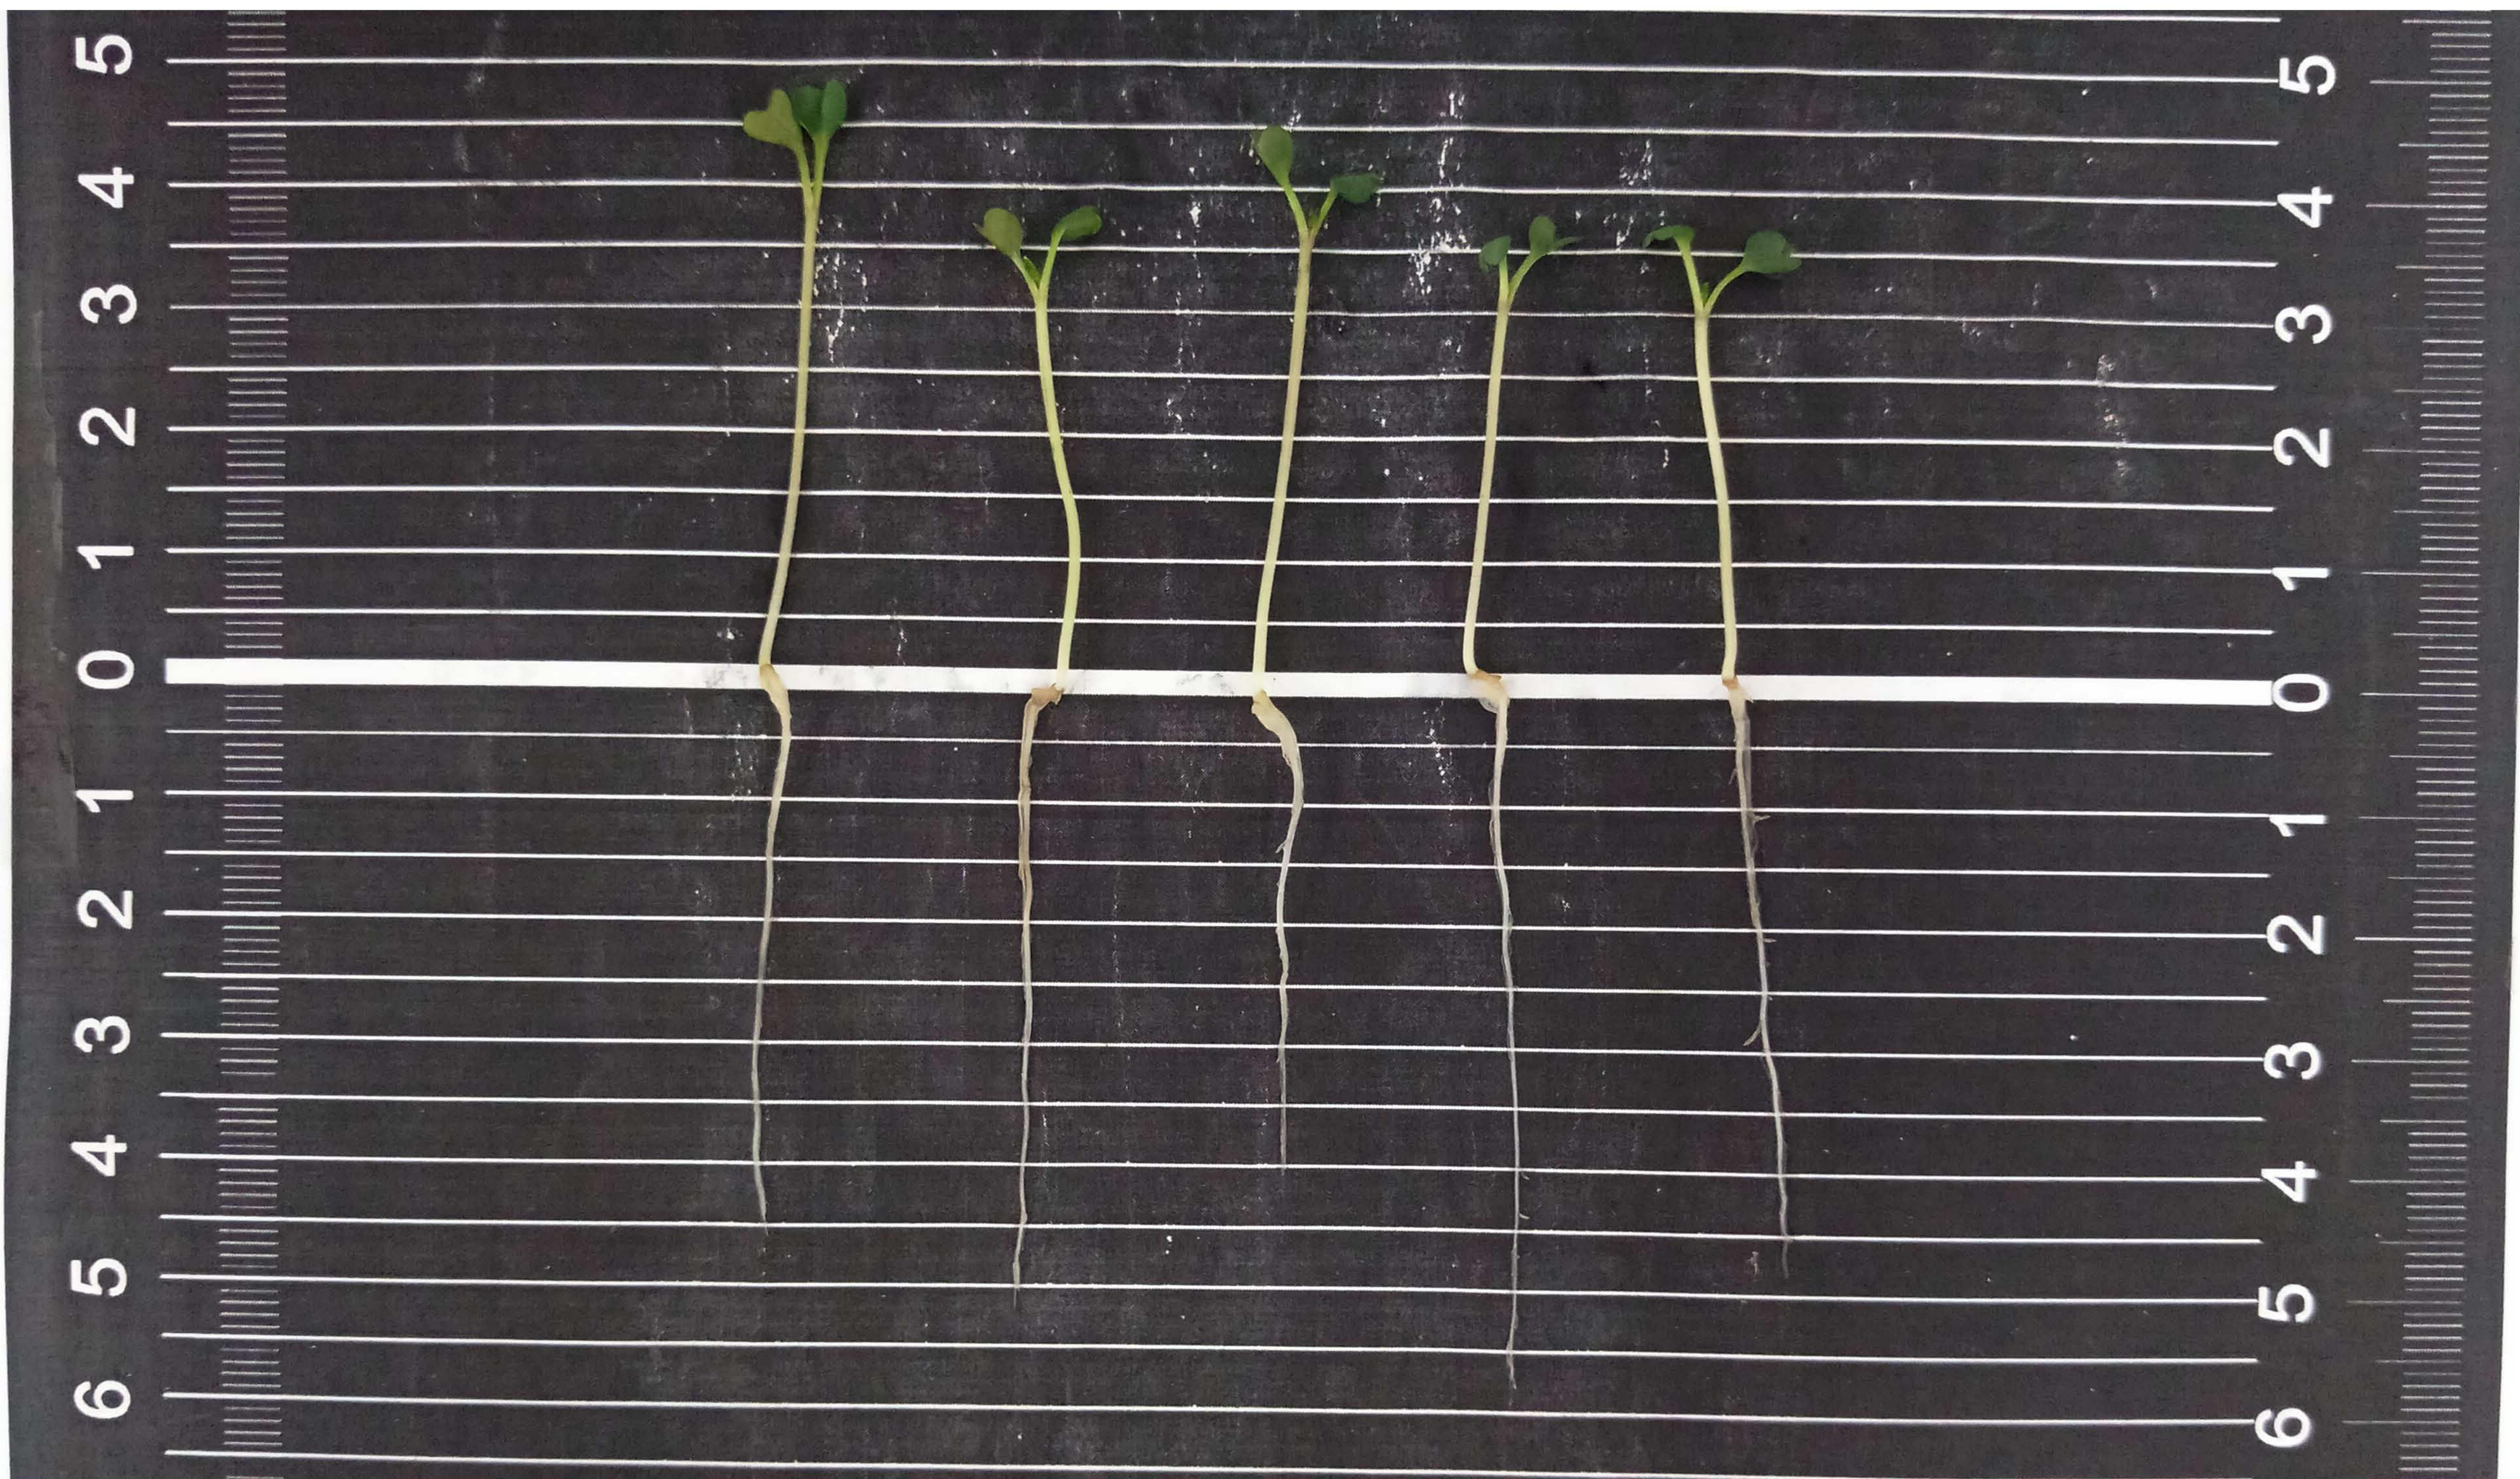

B34-As<sup>3+</sup>

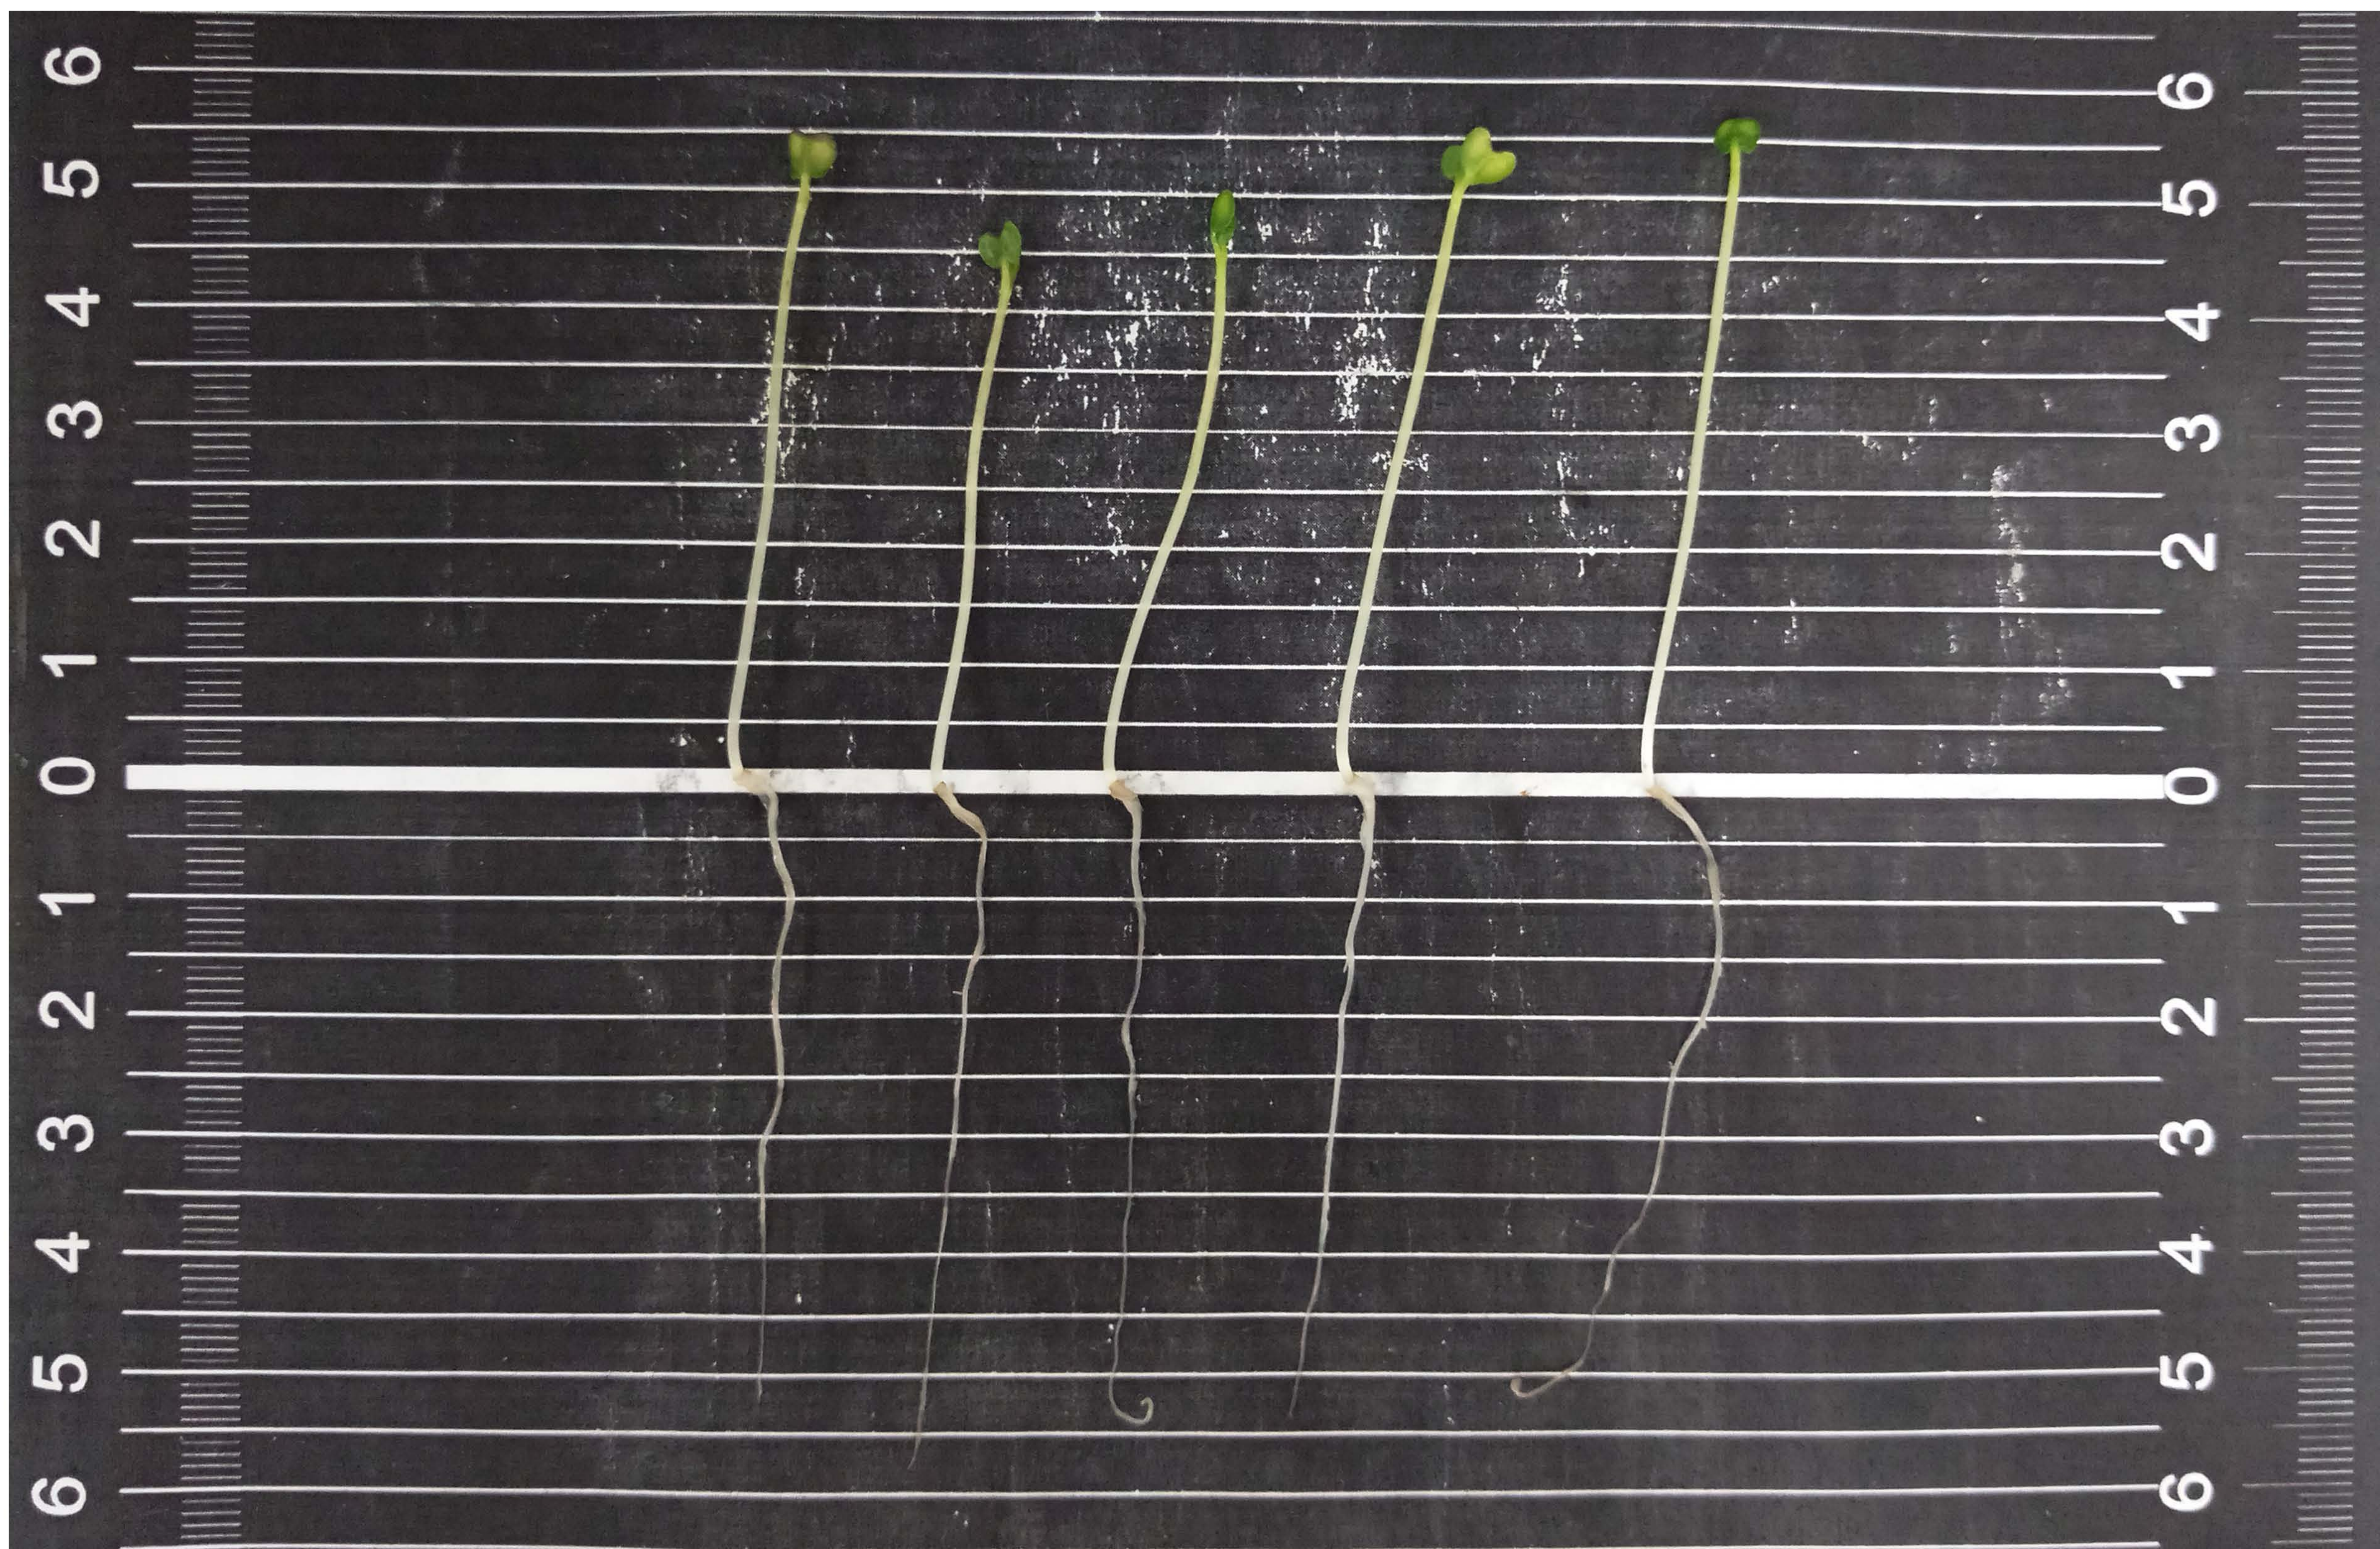

B93-CK

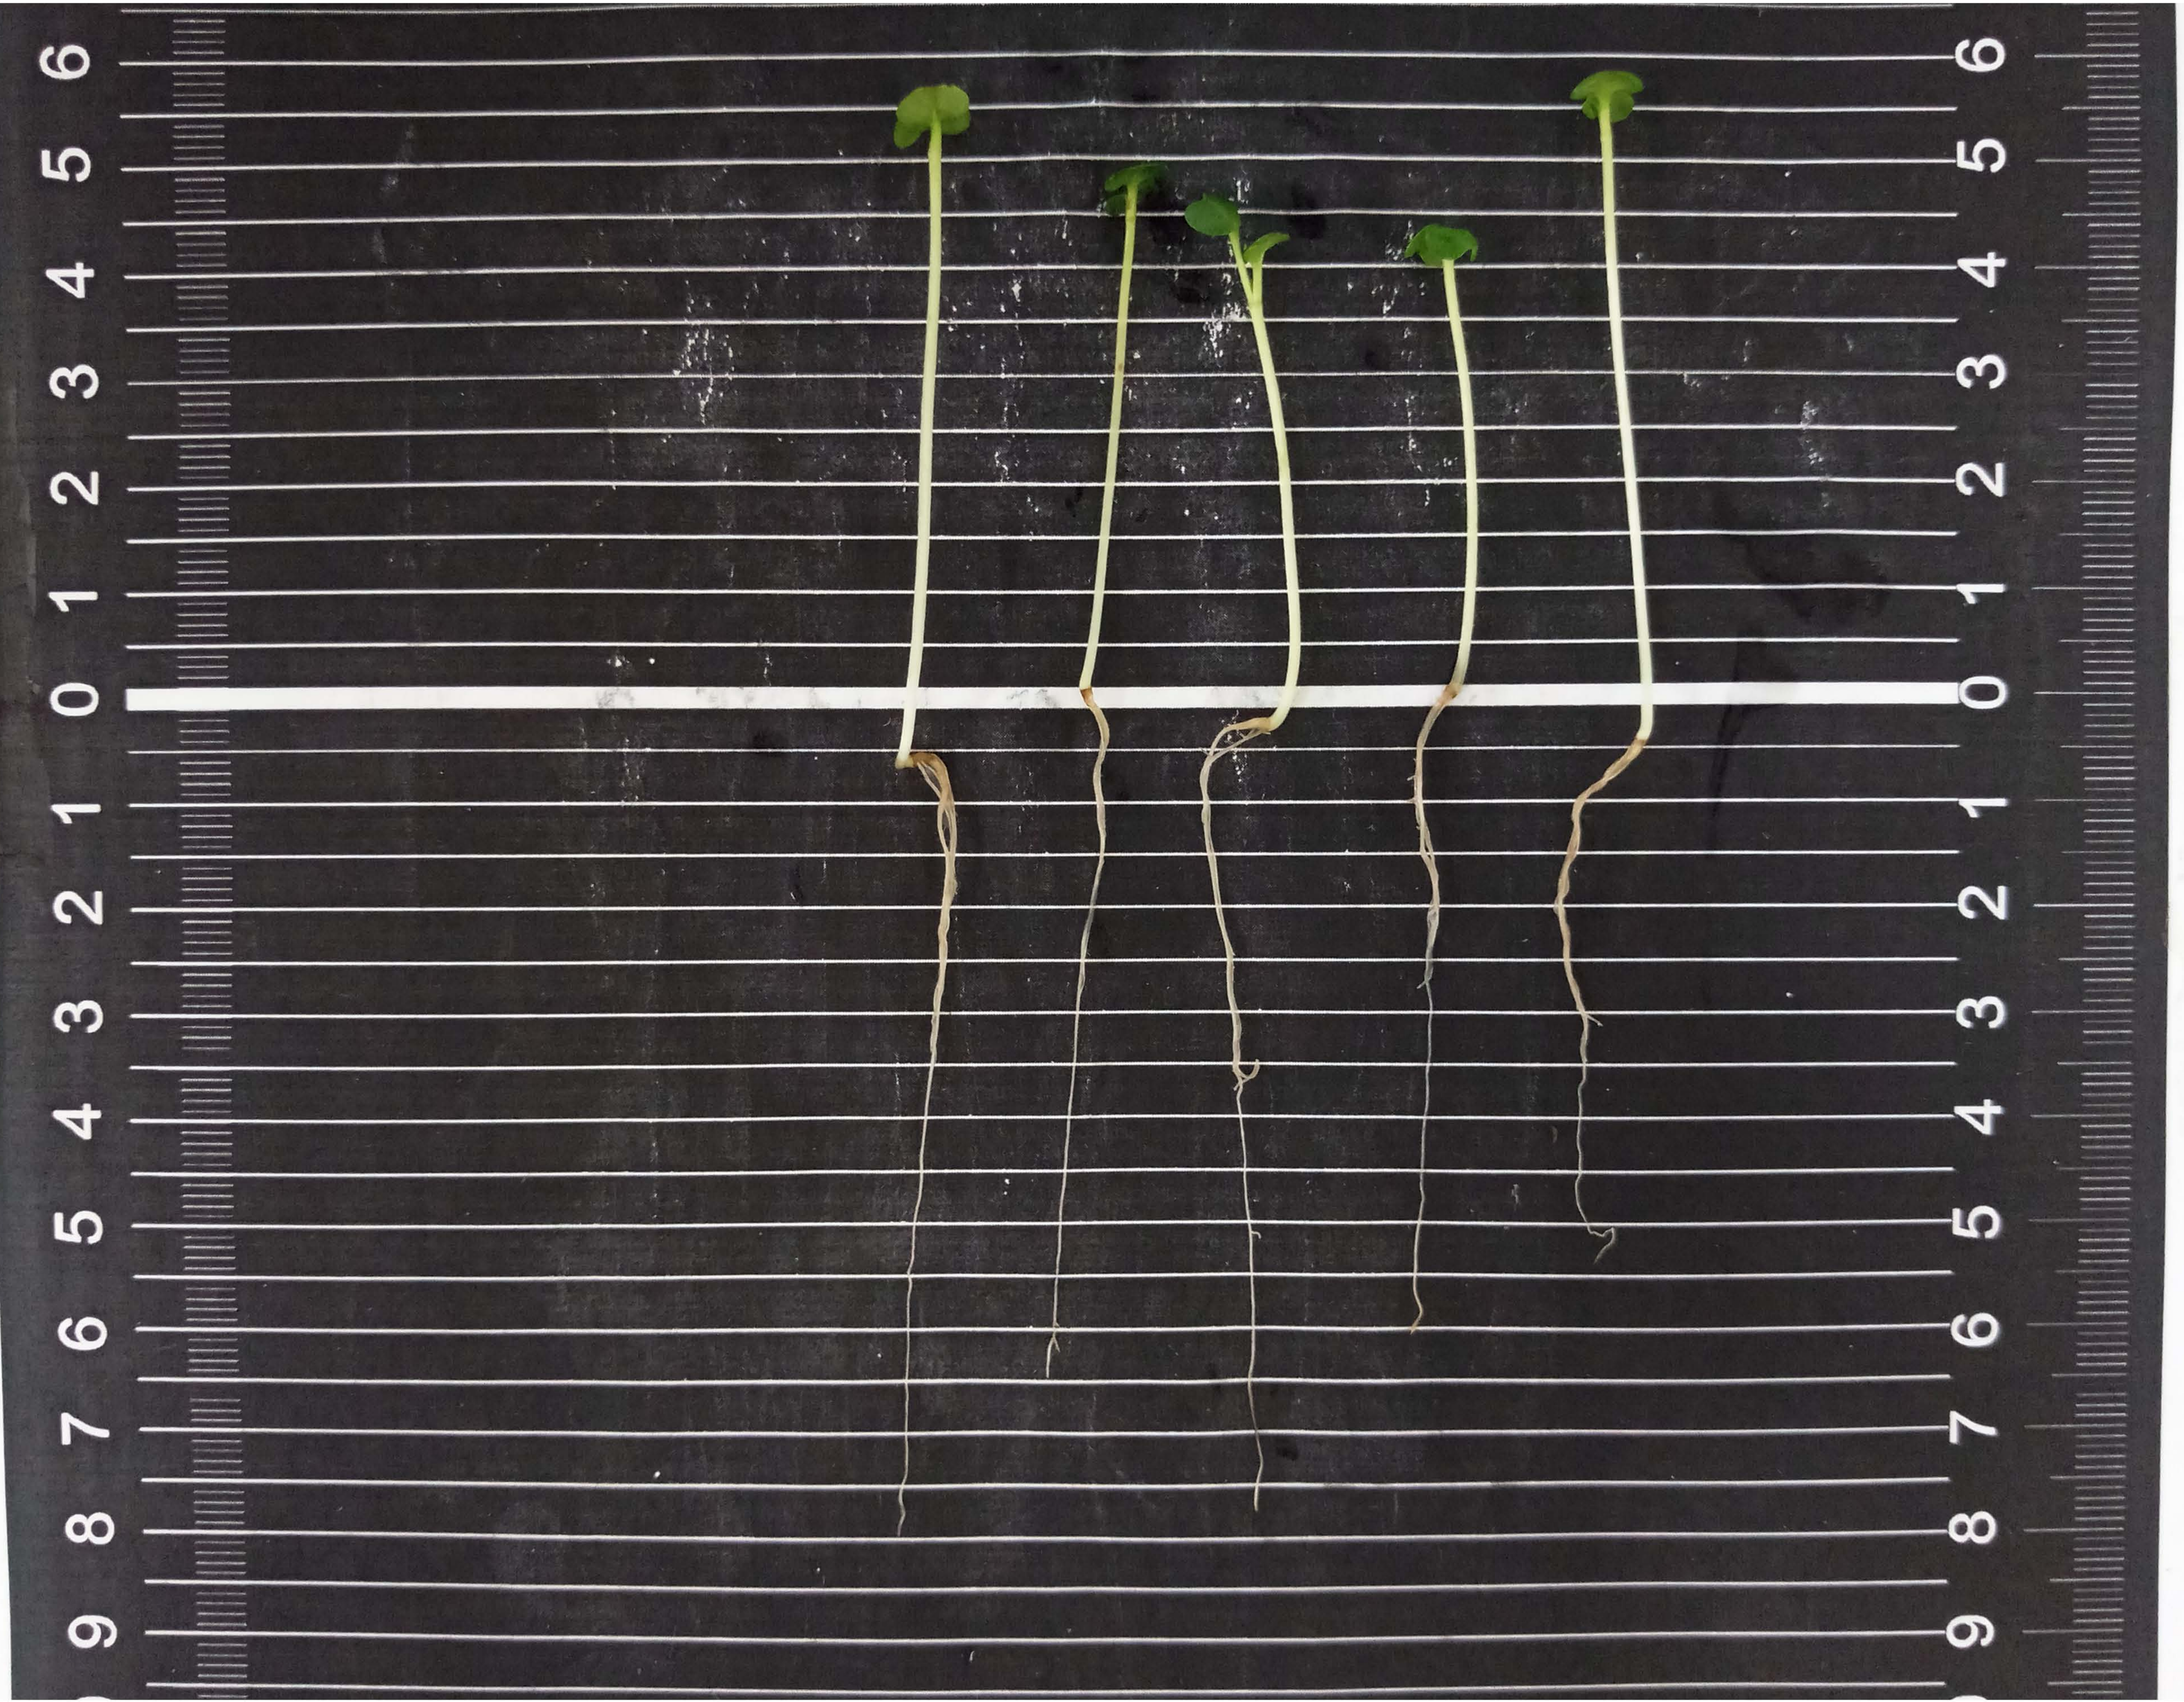

B93-As<sup>3+</sup>

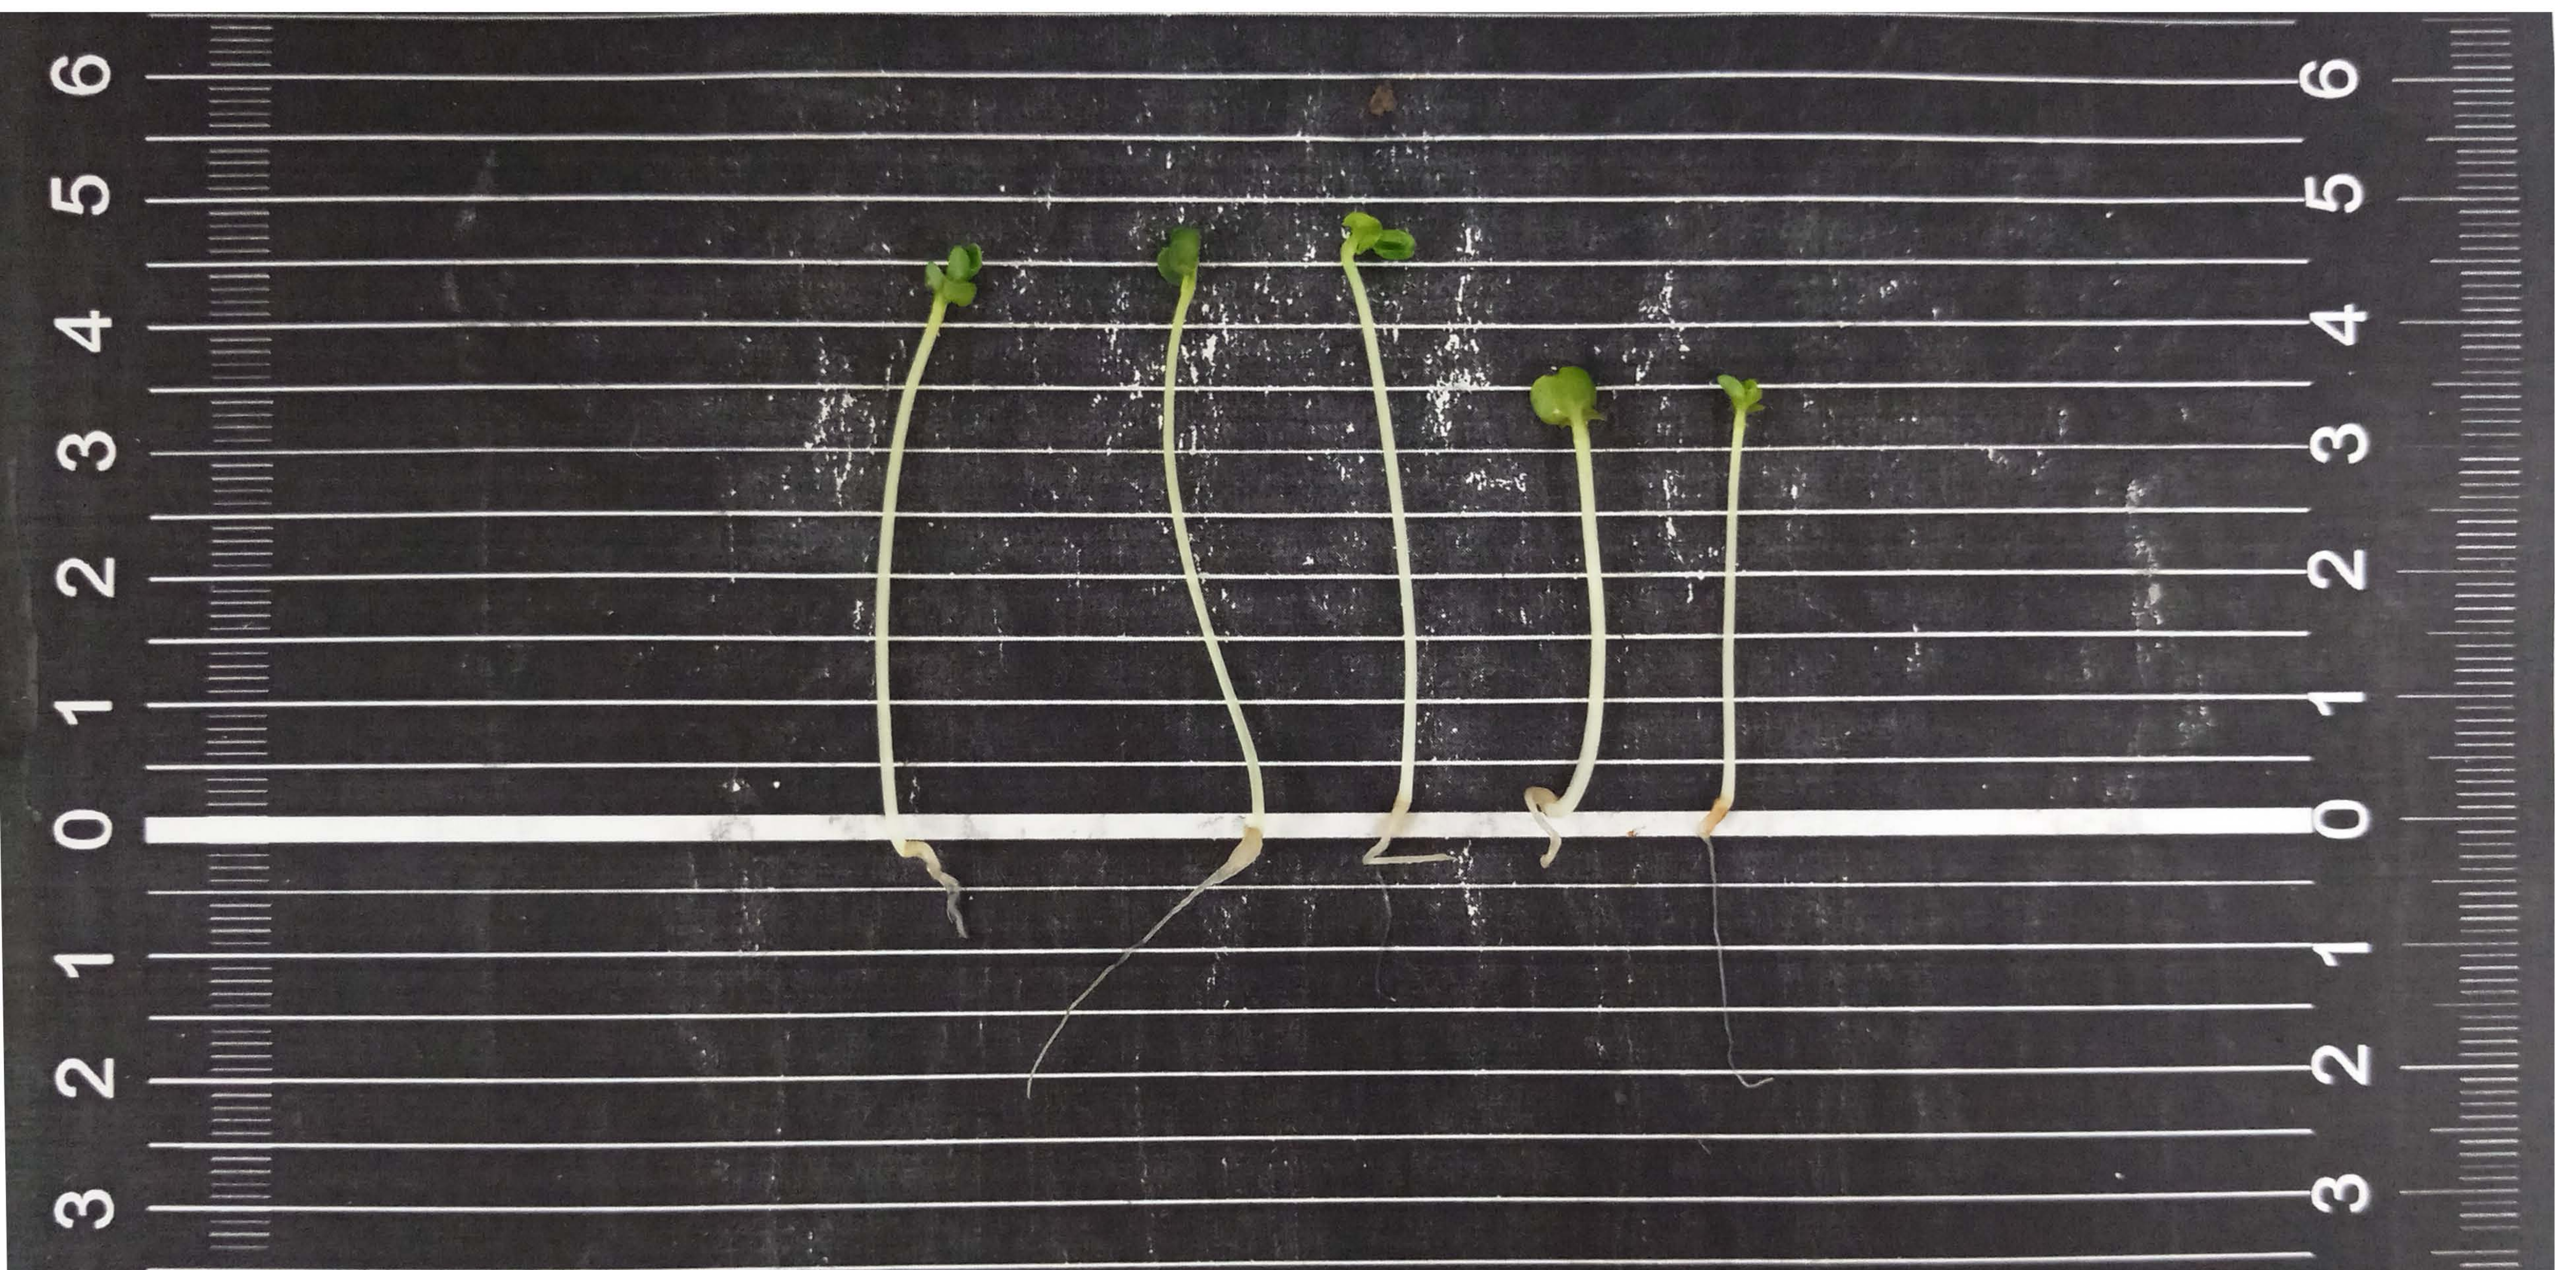

B113-CK

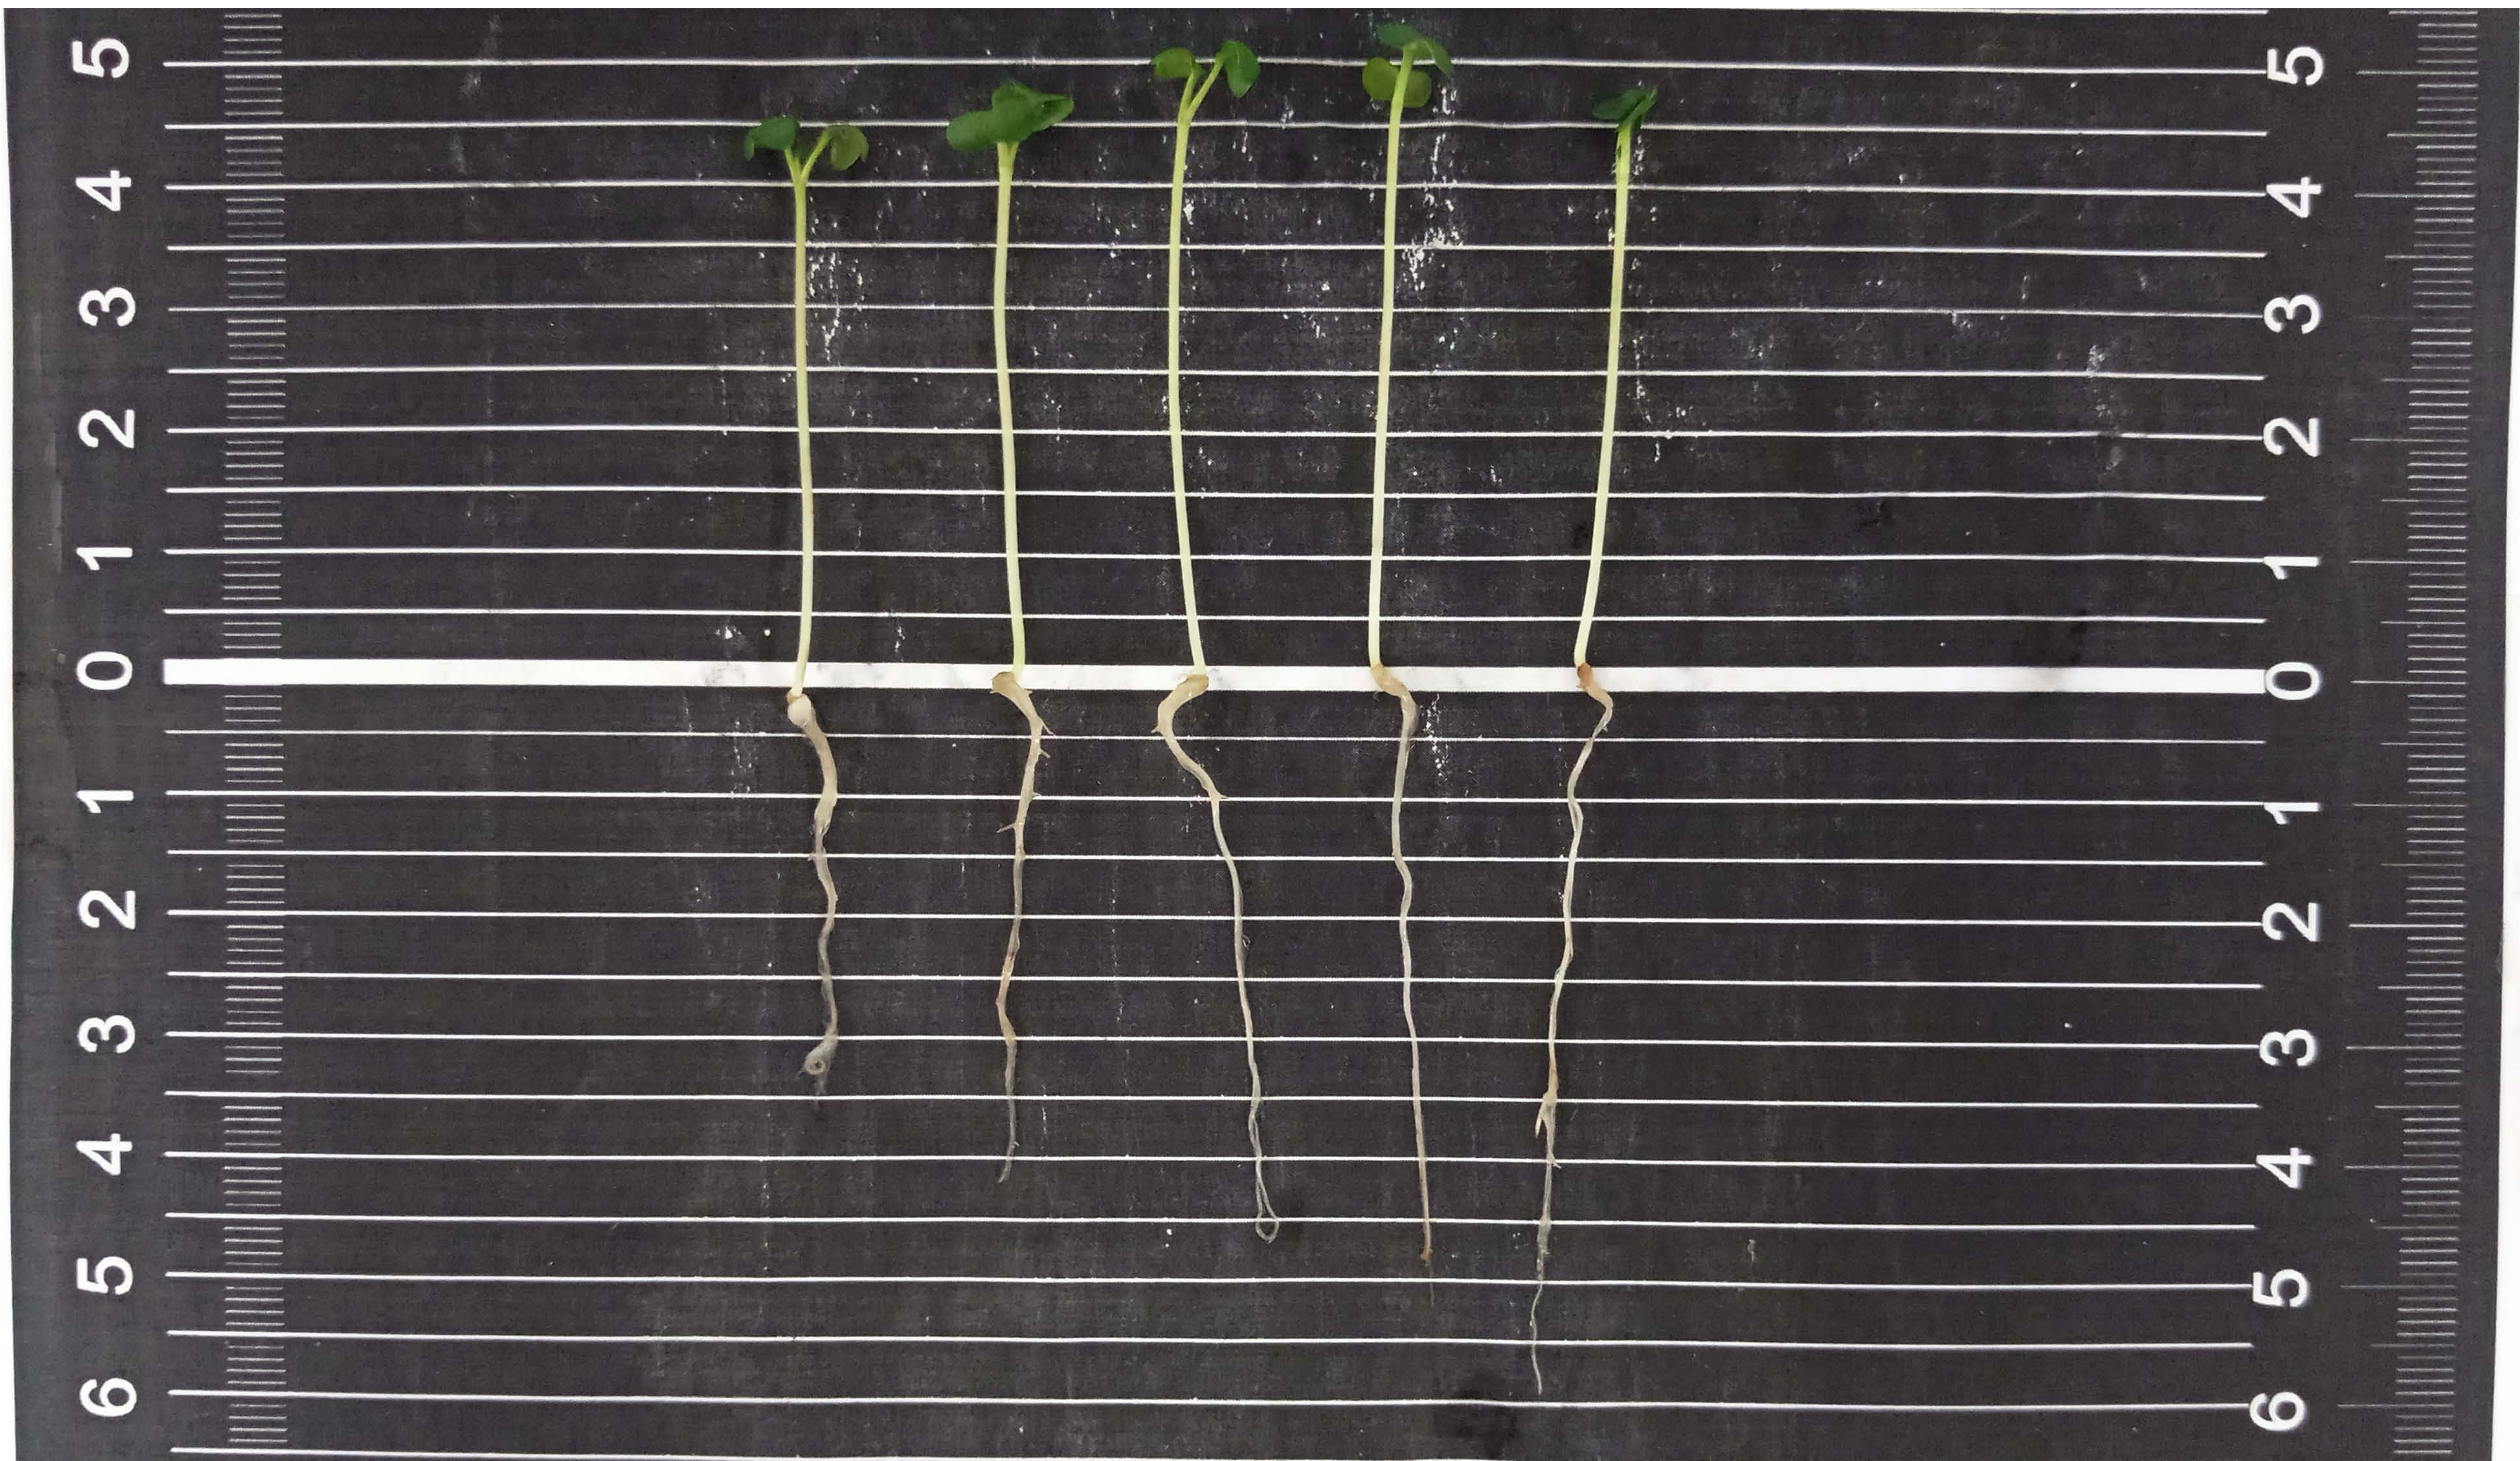

B113-As<sup>3+</sup>

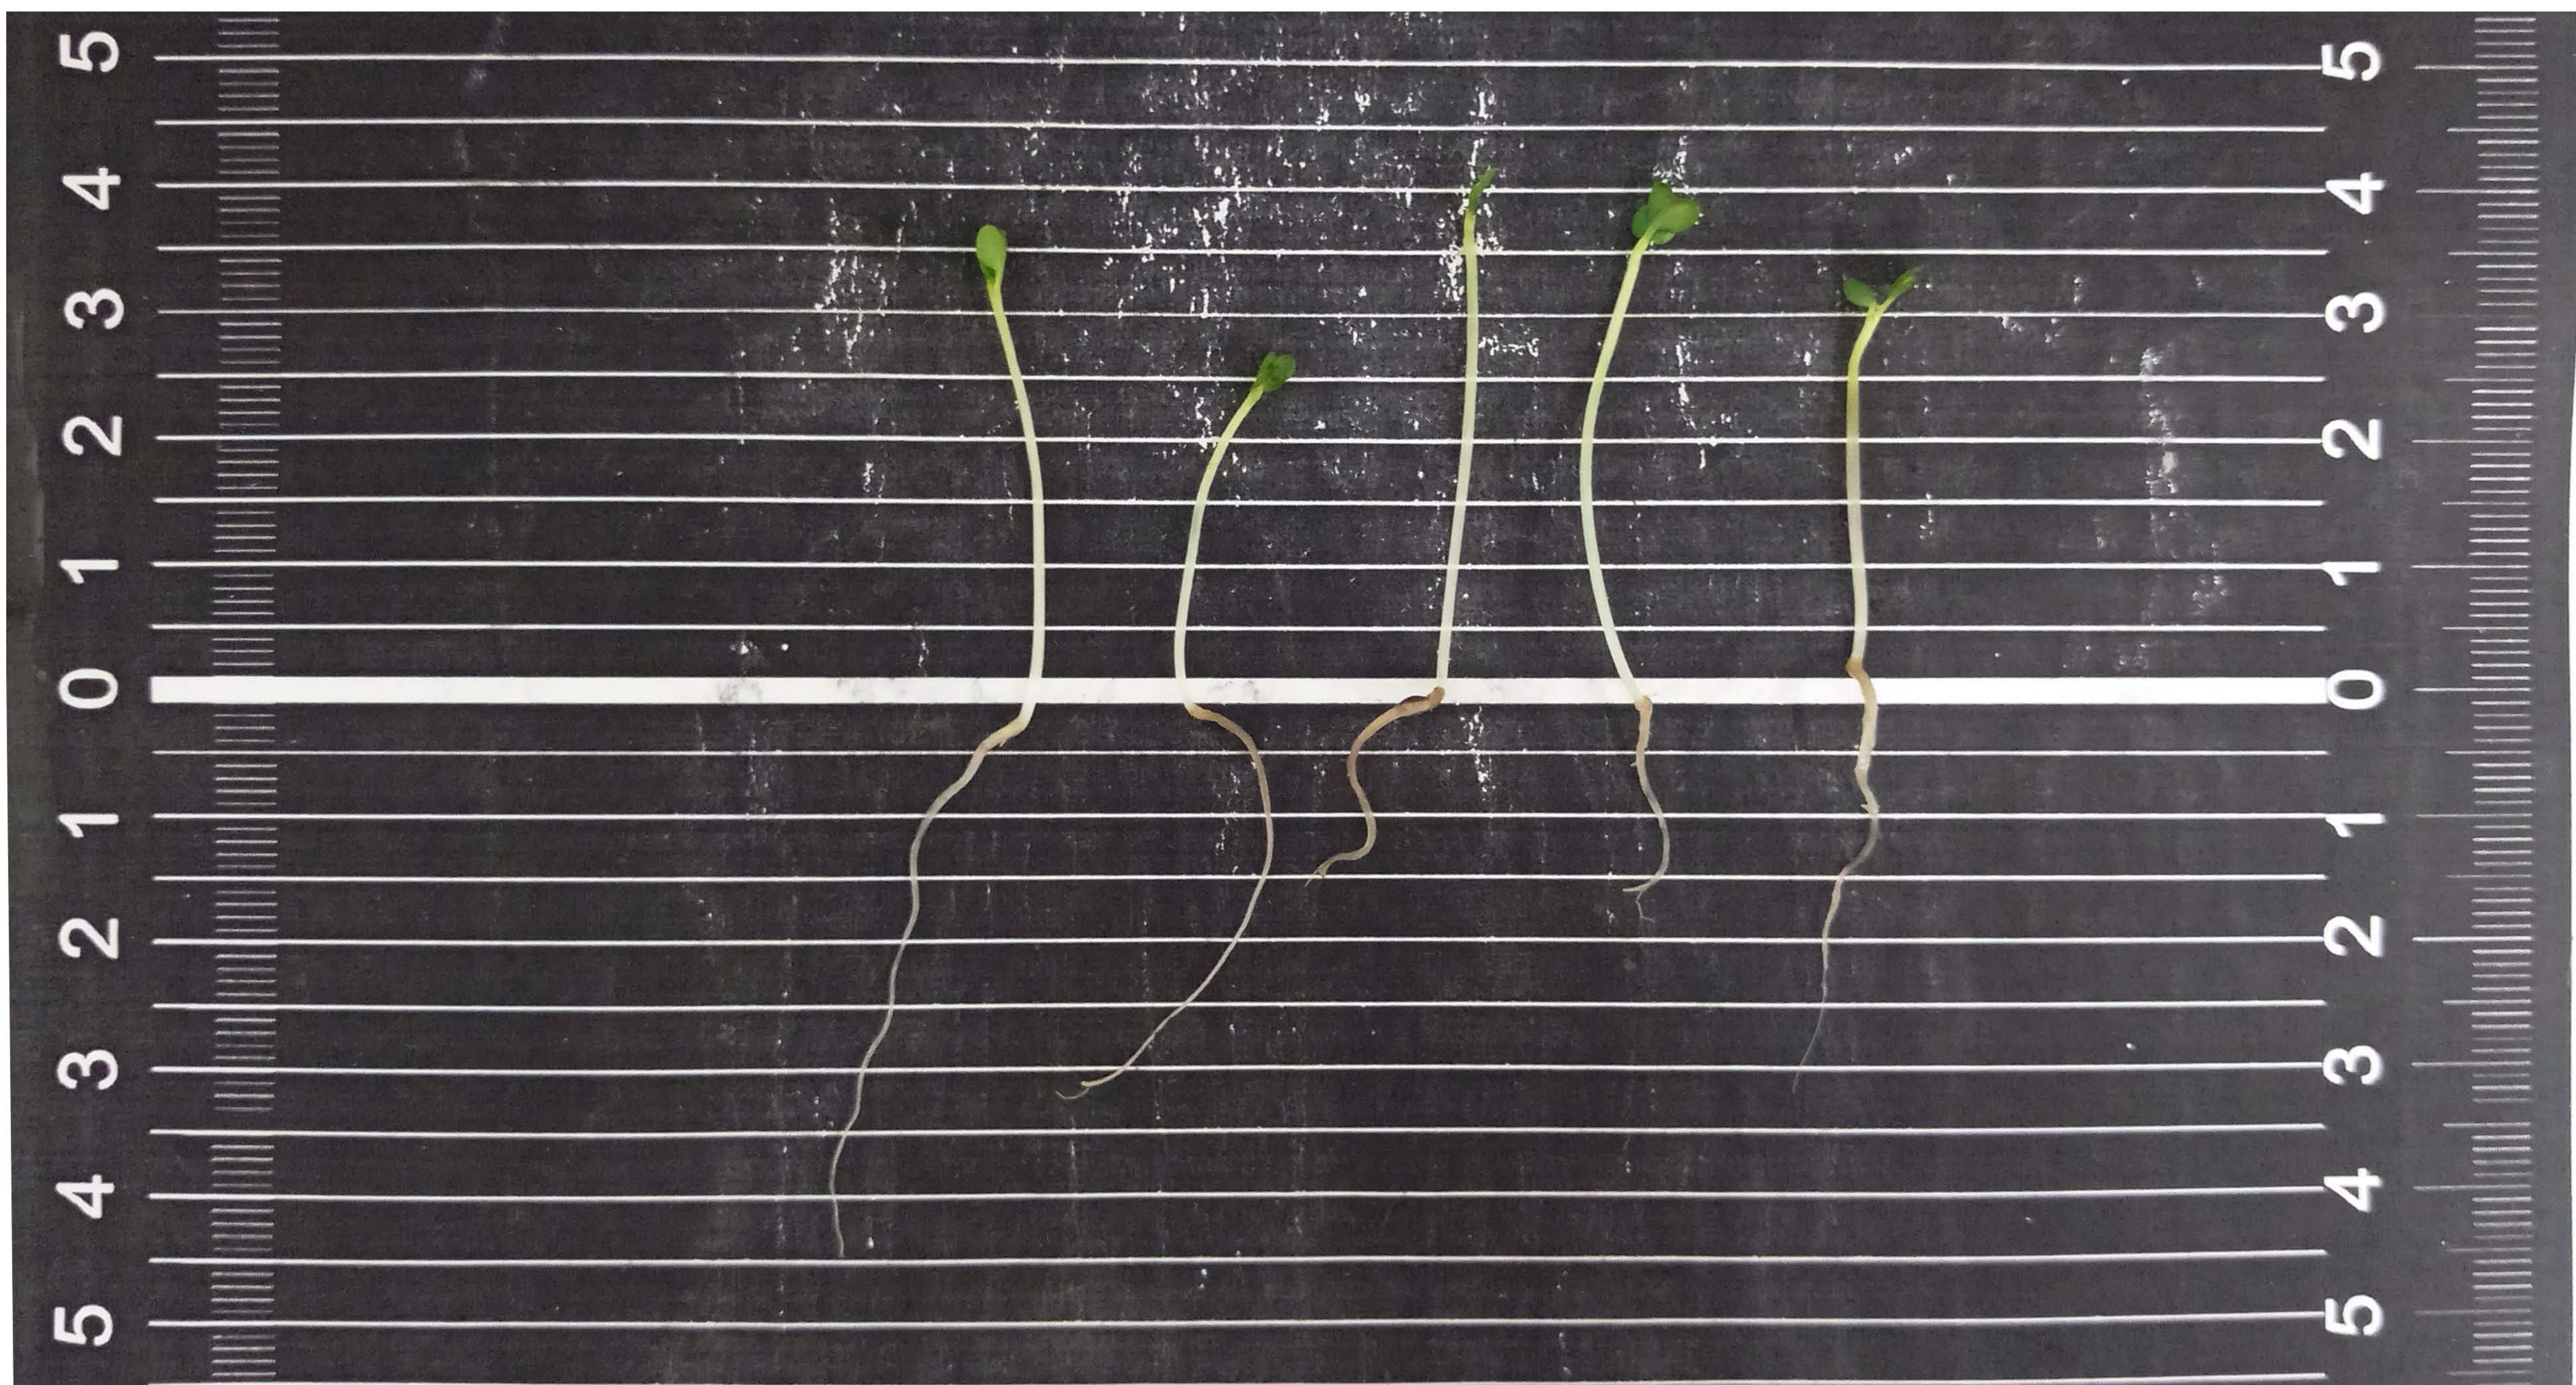

Supplement: s1 [file s1]

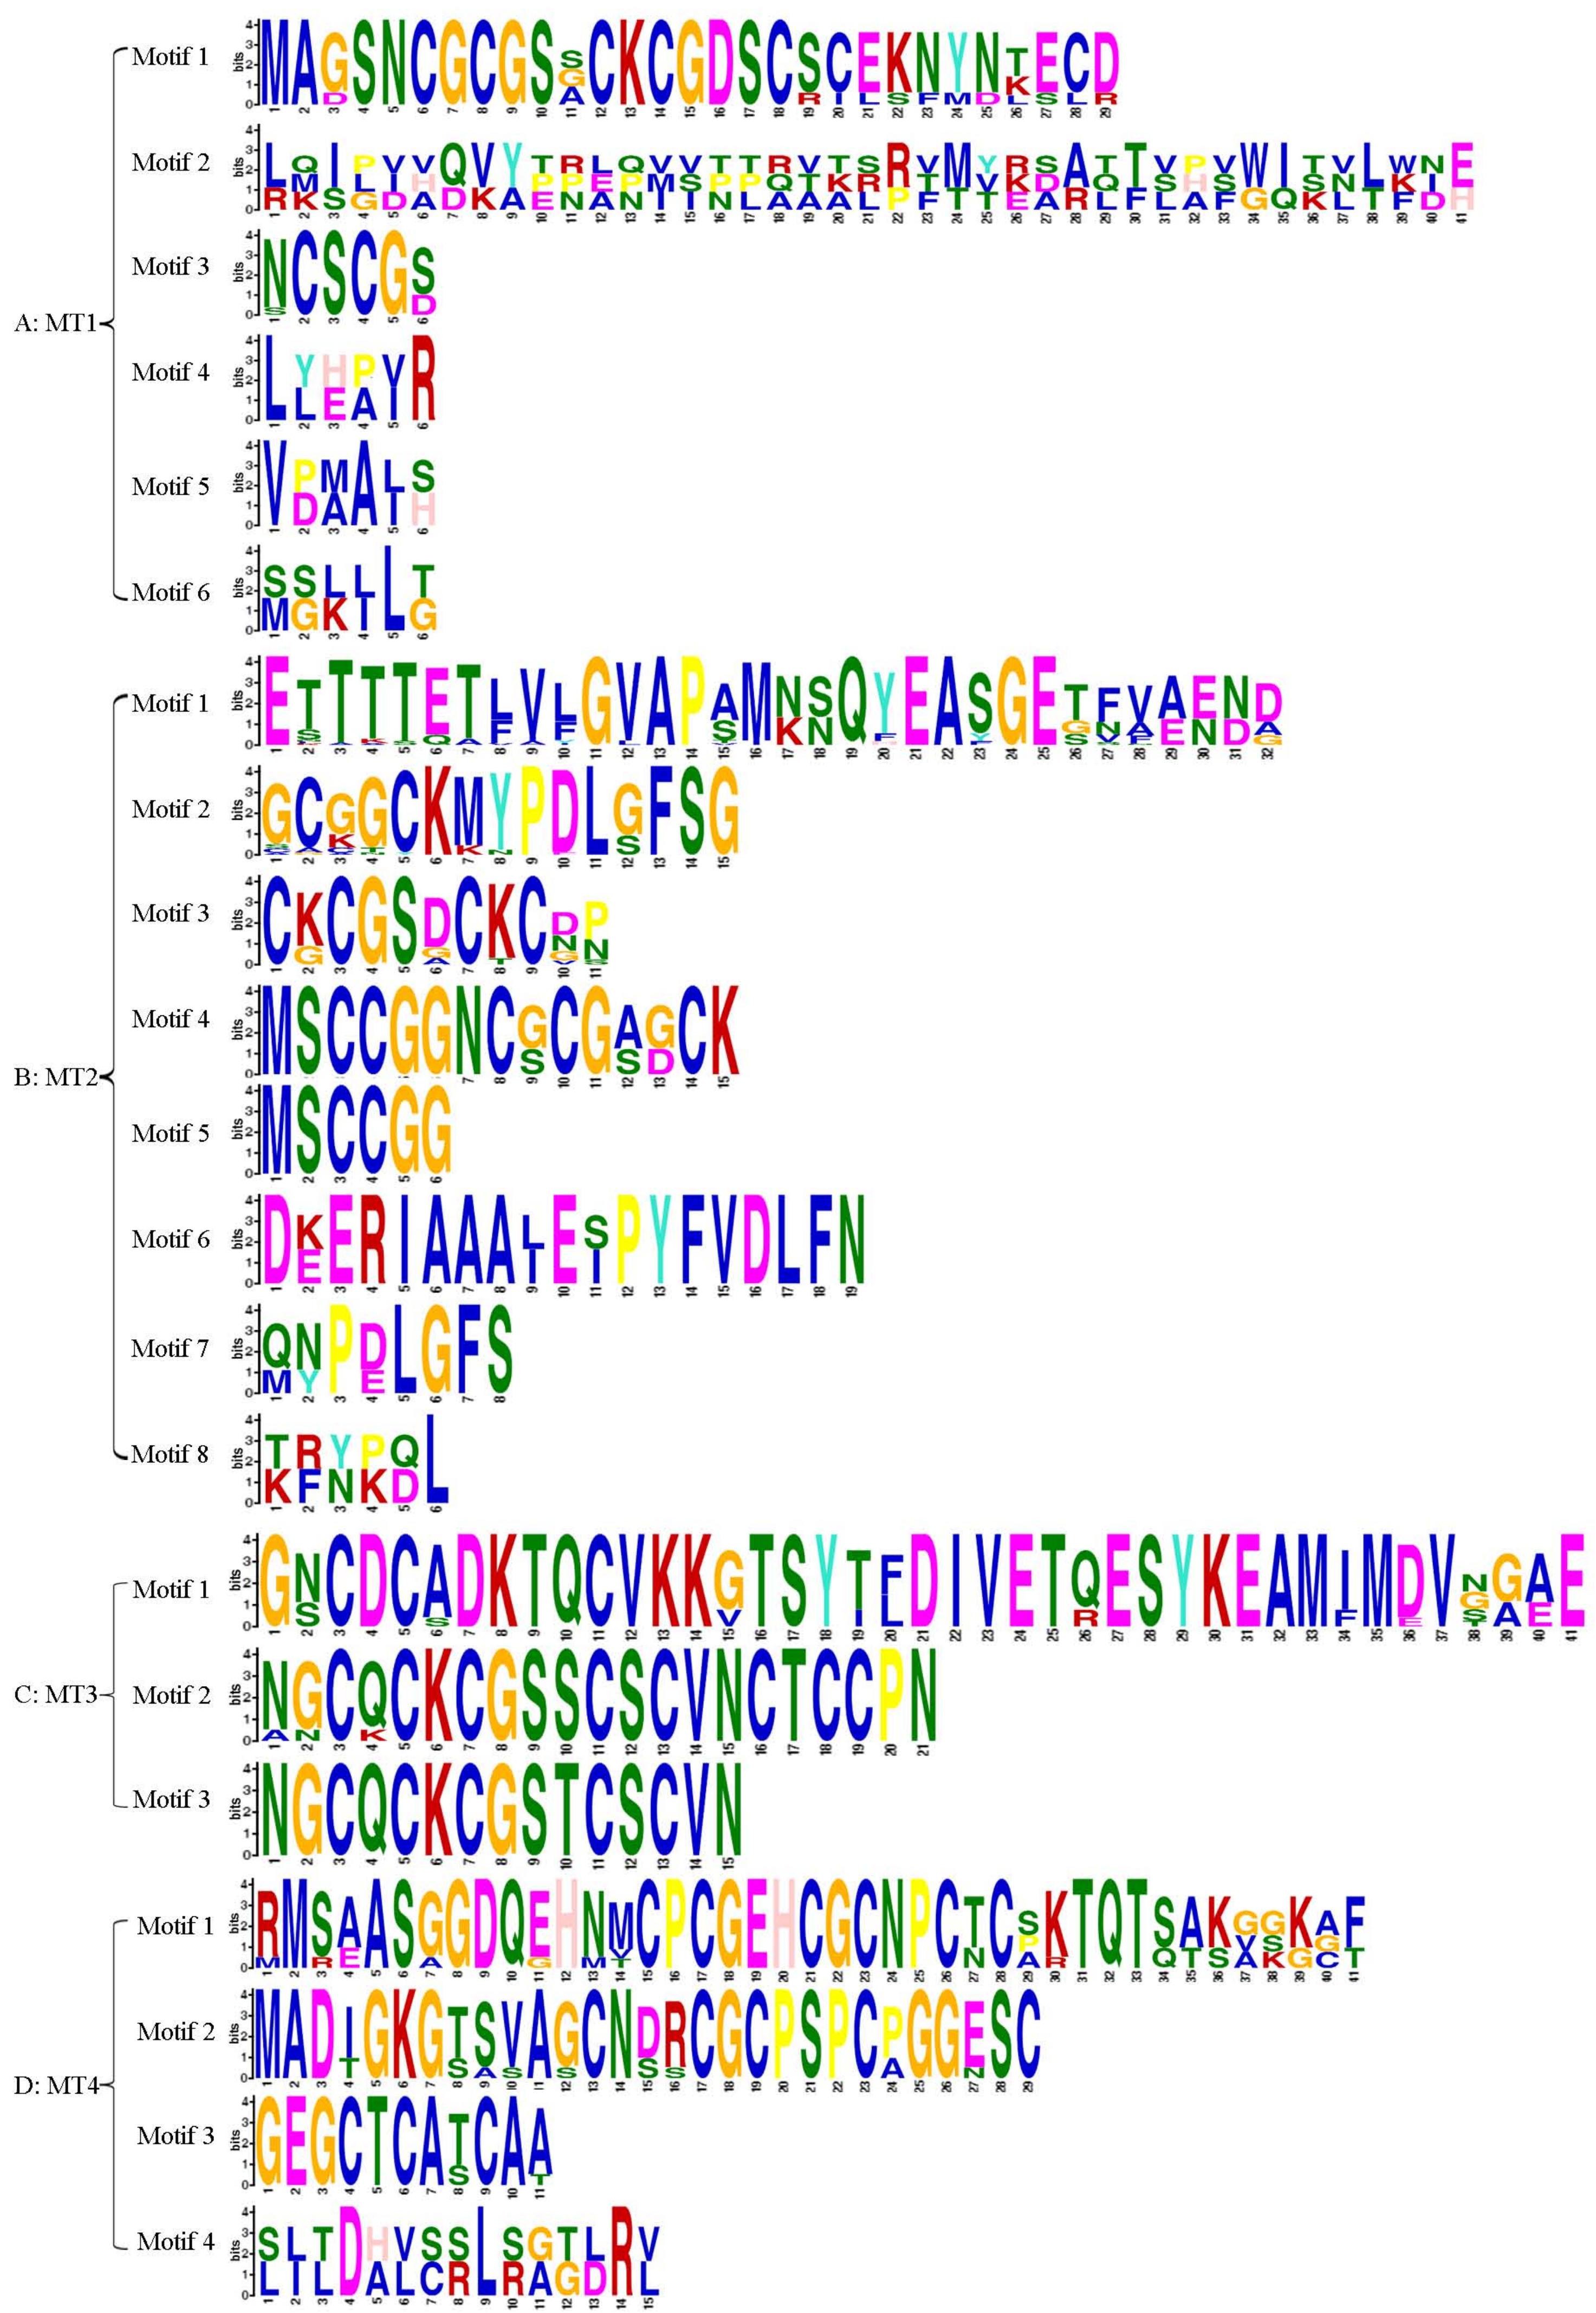

Supplement: s1 [file s1]
